# Supplementary material for: Risk Perception among Psychiatric Patients during the COVID-19 Pandemic
Source: MDPI journal article supplement (doi:10.3390/ijerph19052620), 2022-02-24
Supplement: s1 [file s1]

Table S1. Correlation matrix of COVID-19 risk related variables for patients with depression

|                                     | Mortality INFARTO | Perceived mortality risk for STROKE | Negative states | Anxiety states |
|-------------------------------------|-------------------|-------------------------------------|-----------------|----------------|
| Perceived mortality risk for STROKE | <b>,871*</b>      | --                                  |                 |                |
| Perceived mortality risk for CANCER | <b>,673*</b>      |                                     | <b>,567*</b>    |                |
| Anxiety states                      | ,116              | ,133                                | <b>,666*</b>    | --             |
| Uncertainty states                  | ,440              | ,368                                | <b>,633*</b>    | <b>,594*</b>   |
| Psychological risk index            | <b>,596*</b>      | <b>,519*</b>                        | ,364            | ,222           |

The Spearman correlation matrix considered the following variables: **Perceived mortality risk** for COVID 19, heart attack, stroke, cancer, dementia or infection, perceived control, perceived knowledge, negative states, anxiety states, uncertainty states, positive states, Likelihood of COVID-19 resolution index, health likelihood index, work risk index, Institutional-economy risk index, interpersonal risk index, health concern index, psychological risk index, efficacy index. The numbers in **bold** with the asterisk (\*) indicate the correlations that stay significant after Bonferroni correction (p-value < 0.00025). Non-significant correlations not shown.

Table S2. Correlation matrix of COVID-19 risk related variables for patients with bipolar disorder

|                                        | Perceived mortality risk for COVID 19 | Perceived mortality risk for HEART ATTACK | Perceived mortality risk for STROKE | Perceived mortality risk for CANCER | Perceived mortality risk for DEMENTIA | Negative states | Anxiety states | Uncertainty states | Health likelihood index | Work risk index |
|----------------------------------------|---------------------------------------|-------------------------------------------|-------------------------------------|-------------------------------------|---------------------------------------|-----------------|----------------|--------------------|-------------------------|-----------------|
| Perceived mortality risk for STROKE    | ,447                                  | <b>,747*</b>                              | --                                  |                                     |                                       |                 |                |                    |                         |                 |
| Perceived mortality risk for CANCER    | ,381                                  | <b>,531*</b>                              | <b>,514*</b>                        | --                                  |                                       |                 |                |                    |                         |                 |
| Perceived mortality risk for DEMENTIA  | <b>,516*</b>                          | <b>,544*</b>                              | <b>,560*</b>                        | <b>,654*</b>                        | --                                    |                 |                |                    |                         |                 |
| Perceived mortality risk for INFECTION | <b>,571*</b>                          | ,407                                      | ,384                                | <b>,549*</b>                        | ,447                                  |                 |                |                    |                         |                 |
| Anxiety states                         | ,275                                  | ,202                                      | ,280                                | ,216                                | ,272                                  | <b>,789*</b>    | --             |                    |                         |                 |
| Uncertainty states                     | ,249                                  | ,228                                      | ,446                                | ,170                                | ,196                                  | <b>,666*</b>    | <b>,775*</b>   | --                 |                         |                 |
| Institutional-economy risk index       | ,327                                  | ,269                                      | ,323                                | ,357                                | ,246                                  | <b>,576*</b>    | ,424           | ,378               | <b>,502*</b>            | <b>,659*</b>    |
| Interpesonal risk index                | ,385                                  | ,440                                      | ,411                                | ,430                                | <b>,616*</b>                          | <b>,522*</b>    | ,319           | ,299               | ,190                    | ,464            |
| Psychological risk index               | ,214                                  | ,288                                      | ,364                                | ,239                                | ,209                                  | ,493            | ,429           | ,516               | ,178                    | <b>,569*</b>    |

The Spearman correlation matrix considered the following variables: **Perceived mortality risk** for COVID 19, heart attack, stroke, cancer, dementia or infection, perceived control, perceived knowledge, negative states, anxiety states, uncertainty states, positive states, Likelihood of COVID-19 resolution index, health likelihood index, work risk index, Institutional-economy risk index, interpersonal risk index, health concern index, psychological risk index, efficacy index. The numbers in **bold** with the asterisk (\*) indicate the correlations that stay significant after Bonferroni correction (p-value < 0.00025). Non-significant correlations not shown.

Table S3. Correlation matrix of COVID-19 risk related variables for patients with schizophrenia

|                                        | Perceived mortality risk for HEART ATTACK | Perceived mortality risk for STROKE | Perceived mortality risk for CANCER | Perceived mortality risk for CANCER | Negative states | Anxiety index | Health likelihood index | Work risk index | Interpersonal risk index | Health concern index |
|----------------------------------------|-------------------------------------------|-------------------------------------|-------------------------------------|-------------------------------------|-----------------|---------------|-------------------------|-----------------|--------------------------|----------------------|
| Perceived mortality risk for STROKE    | <b>,693*</b>                              | --                                  |                                     |                                     |                 |               |                         |                 |                          |                      |
| Perceived mortality risk for CANCER    | ,404                                      | <b>,573*</b>                        | --                                  |                                     |                 |               |                         |                 |                          |                      |
| Perceived mortality risk for DEMENTIA  | ,102                                      | ,232                                | <b>,616*</b>                        | --                                  |                 |               |                         |                 |                          |                      |
| Perceived mortality risk for INFECTION | ,284                                      | ,371                                | ,441                                | <b>,543*</b>                        |                 |               |                         |                 |                          |                      |
| Anxiety states                         | ,043                                      | ,107                                | ,148                                | ,264                                | <b>,827*</b>    | --            |                         |                 |                          |                      |
| Uncertainty states                     | -,055                                     | -,135                               | -,099                               | ,270                                | <b>,609*</b>    | <b>,643*</b>  |                         |                 |                          |                      |
| Health likelihood index                | ,286                                      | ,347                                | ,470                                | ,298                                | ,302            | <b>,509*</b>  | --                      |                 |                          |                      |
| Interpesonal risk index                | ,217                                      | ,130                                | ,193                                | ,192                                | ,227            | ,176          | ,425                    | <b>,682*</b>    | --                       |                      |
| Health concern index                   | -,010                                     | ,009                                | ,287                                | ,309                                | ,378            | <b>,546*</b>  | ,485                    | ,109            | ,170                     | --                   |
| Psychological risk index               | ,045                                      | ,231                                | ,304                                | ,331                                | ,496            | <b>,550*</b>  | <b>,515*</b>            | ,292            | <b>,537*</b>             | <b>,501*</b>         |

The Spearman correlation matrix considered the following variables: **Perceived mortality risk** for COVID 19, heart attack, stroke, cancer, dementia or infection, perceived control, perceived knowledge, negative states, anxiety states, uncertainty states, positive states, Likelihood of COVID-19 resolution index, health likelihood index, work risk index, Institutional-economy risk index, interpersonal risk index, health concern index, psychological risk index, efficacy index. The numbers in **bold** with the asterisk (\*) indicate the correlations that stay significant after Bonferroni correction (p-value < 0.00025). Non-significant correlations not shown.
